# Supplementary material
Source: PubMed Central journal article supplement (PMC409928)

A.

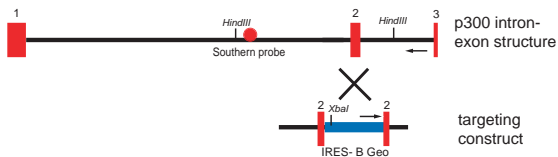

B.

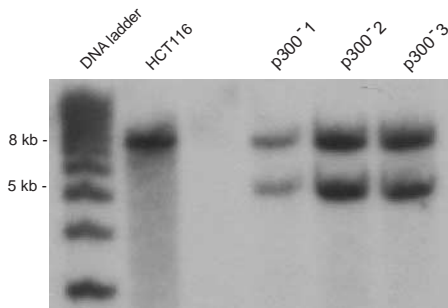

C.

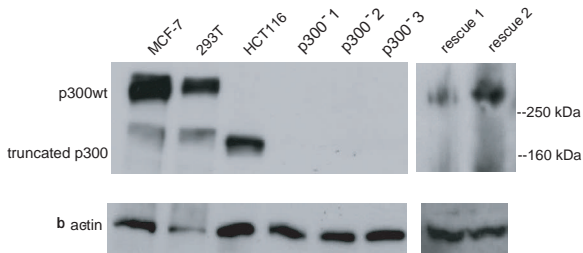

Supplement: pnas_101_19_7386__1.pdf [file pnas_101_19_7386__1.pdf]
